# Supplementary material for: Extracellular matrix stiffness determines the phenotypic behavior of dedifferentiated melanoma cells through a DDR1/2-dependent YAP mechanotransduction pathway
Source: Research Square preprint supplement (doi:10.21203/rs.3.rs-7452585/v1), 2025-09-03
Supplement: Supplementary file 1 [file 6d2e3f390525ffffa975e111.pdf]

## Supplementary Table 1

Phenotypic state and mutation status of the different melanoma cell lines and short-term patient derived melanoma cells used in the study

|                                        | Mutation status | Phenotypic state |
|----------------------------------------|-----------------|------------------|
| <i>Cell line</i>                       |                 |                  |
| 1205Lu                                 | BRAFV600E       | Dedifferentiated |
| 501Mel                                 | BRAFV600E       | Melanocytic      |
| <i>Short-term patient-derived cell</i> |                 |                  |
| MM029                                  | BRAFV600E       | Dedifferentiated |
| MM099                                  | BRAFV600E       | Dedifferentiated |
| MM074                                  | BRAFV600E       | Melanocytic      |
| MM034                                  | BRAFV600E       | Melanocytic      |
| MM165                                  | NRASQ61L        | Dedifferentiated |
| MM047                                  | NRASQ61L        | Dedifferentiated |
| MM057                                  | NRASQ61L        | Melanocytic      |
| MM001                                  | NRASQ61L        | Melanocytic      |
